# Supplementary figures and images for: Proteomic profiles revealed enzymatic activities associated with the flavor formation of salted shrimp paste influenced by Bacillus subtilis K-C3 inoculation
Source: Royal Society of Chemistry journal article supplement (doi:10.1039/d4fo02645d), 2024-01-01

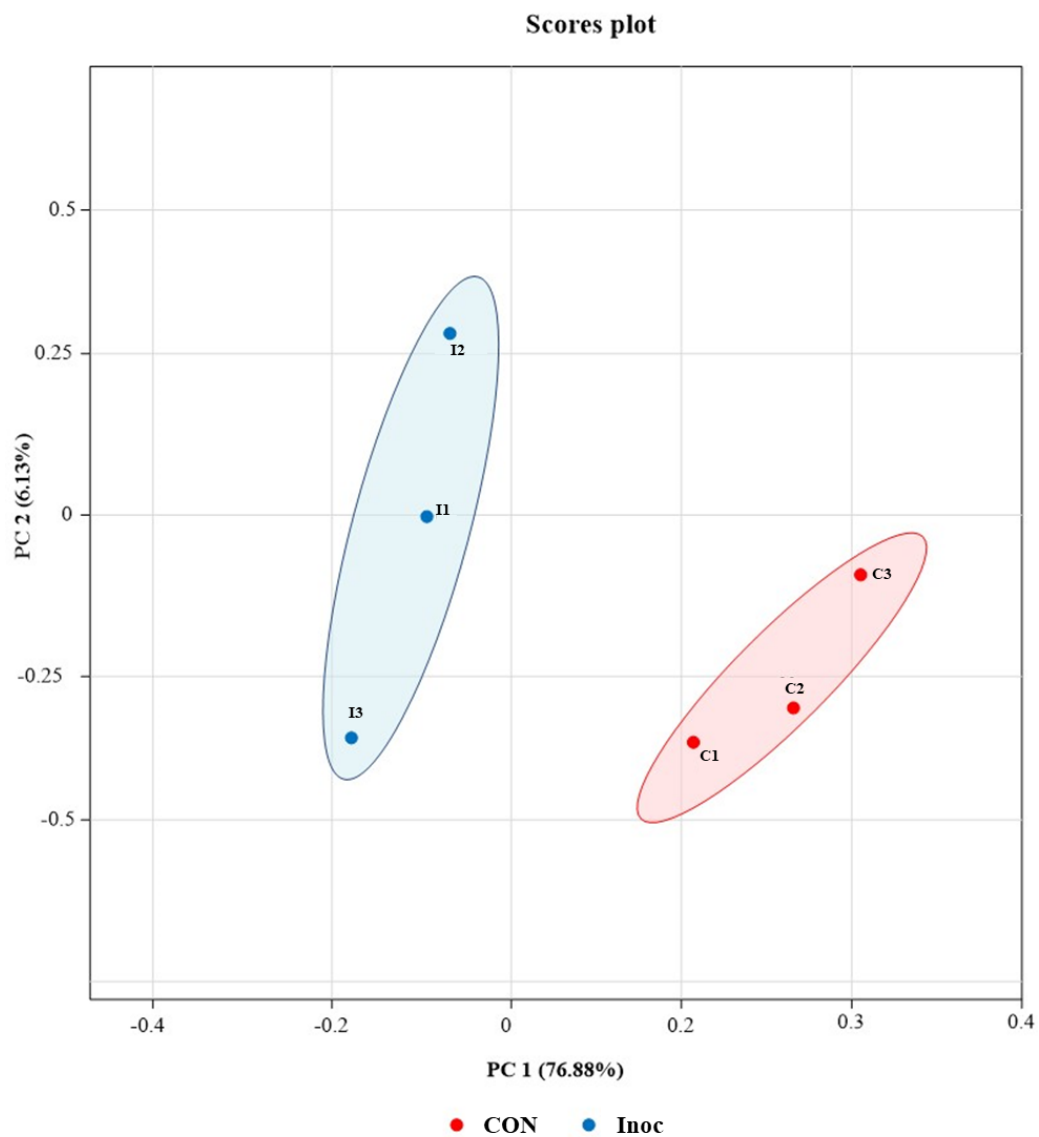

**Fig. S2.** PCA score plot of DAPs extracted from shrimp paste with (**Inoc**) and without (**CON**) inoculation.

Supplement: d4fo02645d2.pdf [file d4fo02645d2.pdf]
